# Supplementary material
Source: ML conference proceedings conference paper supplement (https://proceedings.neurips.cc/paper_files/paper/2023/hash/5e8309c9ca683e11672e3dbcd4b87776-Abstract.html)
Supplement: Supplementary file 1 [file 5e8309c9ca683e11672e3dbcd4b87776-Supplemental-Conference.zip]

Archive with 1 entries (1 files):
- Full_paper.pdf
